# Supplementary material
Source: publisher figshare collection journal article supplement (https://acs.figshare.com/ndownloader/files/4152424)
Supplement: Supplementary file 1 [file 4152424]

Supporting Information for

**Zinc Thiolate Reactivity toward Nitrogen Oxides: Insights into the Interaction of  $\text{Zn}^{2+}$  with *S*-Nitrosothiols and Implications for Nitric Oxide Synthase**

Julia Kozhukh and Stephen J. Lippard

*Department of Chemistry, Massachusetts Institute of Technology, Cambridge, MA*

**Email:** lippard@mit.edu

**Contents:**

Figure S1. Infrared spectrum of PAtHNO and related species.

Figure S2. Optical spectra of ZnPAtHOTf + NO (g)  $\pm$  air.

Figure S3. Optical spectra of ZnAPAtHCl + NO (g)  $\pm$  air.

Figure S4. Optical spectra of NOBF<sub>4</sub> reactions with ZnPAtHCl, ZnPAtHOTf, and ZnAPAtHCl.

Figure S5. ESI-MS spectrum of reaction between ZnAPAtHCl + NOBF<sub>4</sub> and *S*-nitrosothiol trapping reagent.

Figure S6. Solution IR timecourse spectra for the reaction of APAtHNO with ZnCl<sub>2</sub> and ZnOTf<sub>2</sub>.

Figure S7. Solution IR comparison of APAtHNO and APAtH<sup>15</sup>NO reaction spectra with ZnCl<sub>2</sub> and ZnOTf<sub>2</sub>.

Figure S8. <sup>1</sup>H NMR comparison of ZnPAtHOTf/NOBF<sub>4</sub> and PAtHNO/ZnOTf<sub>2</sub> reactions.

Figure S9. <sup>1</sup>H NMR titration of Zn(OTf)<sub>2</sub> into solutions of PAtH<sub>2</sub>.

Figure S10. <sup>1</sup>H NMR comparison of a PAtH<sub>2</sub>/ZnOTf<sub>2</sub> mixture with ZnPAtHOTf/NOBF<sub>4</sub> and PAtHNO/ZnOTf<sub>2</sub> solutions.

Figure S11. EI-MS of ZnAPAtHCl/NOBF<sub>4</sub> reaction headspace.

Figure S12. EI-MS of APAtHNO/ZnCl<sub>2</sub> reaction headspace.

Figure S13. EI-MS of APAtHNO/Zn(OTf)<sub>2</sub> reaction headspace.

Figure S14. EI-MS control experiment: analysis of APAtHNO solution headspace.

Figure S15. Optical spectra of NO<sub>2</sub> reactions with ZnPAtHCl, ZnPAtHOTf, and ZnAPAtHCl.

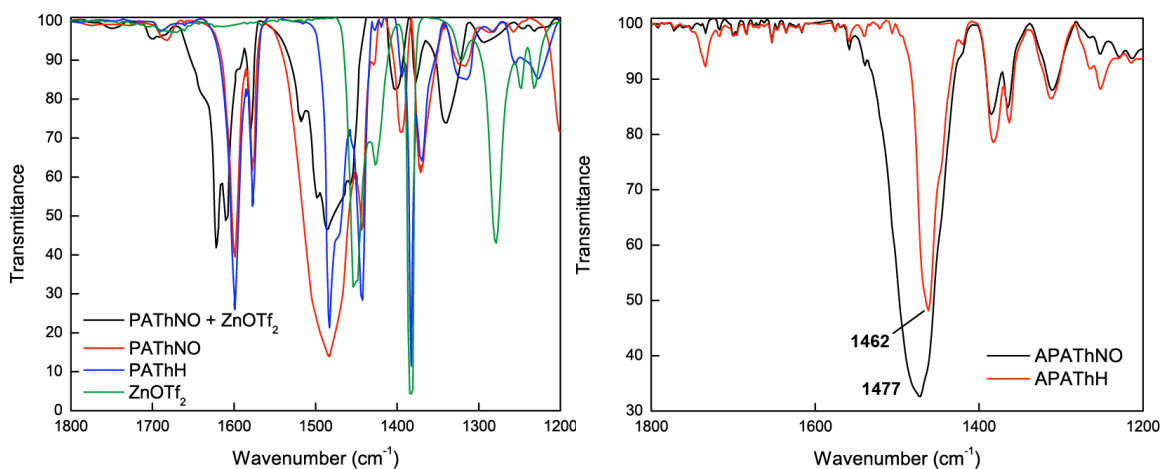

**Figure S1.** *Left:* Infrared spectral comparison of  $\text{Zn}(\text{OTf})_2$ ,  $\text{PATHH}$ ,  $\text{PATHNO}$ , and  $\text{PATHNO} + \text{Zn}(\text{OTf})_2$  in MeCN. Strong absorbance bands between  $1550\text{ cm}^{-1}$  and  $1650\text{ cm}^{-1}$  obscure features arising from the reaction products of  $\text{Zn}^{2+}$  with  $\text{PATHNO}$ . *Right:* The infrared spectra of  $\text{APATHH}$  and  $\text{APATHNO}$  are shown for comparison.

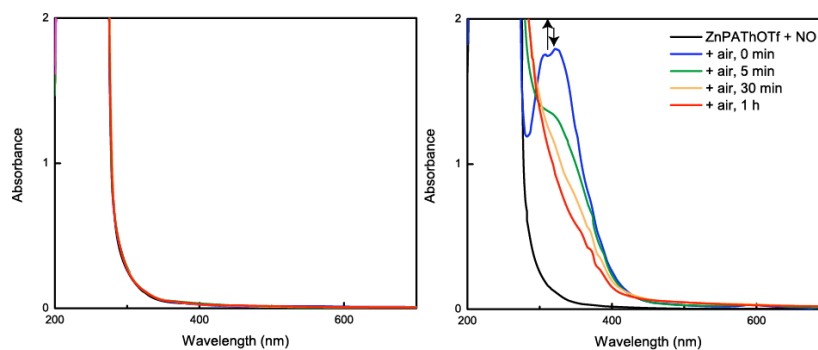

**Figure S2.** UV-Vis spectral profiles for reactions of anaerobic 7.5 mM  $\text{ZnPATHOTf}$  with excess  $\text{NO}$  (g), left, and of 7.5 mM  $\text{ZnPATHOTf}$  with excess  $\text{NO}$  (g) + air, right. Recorded in acetonitrile.

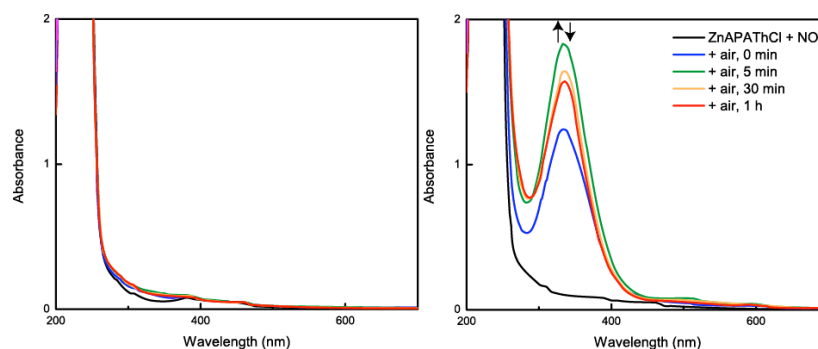

**Figure S3.** UV-Vis spectral profiles for reactions of anaerobic 7.5 mM ZnAPATHCl with excess NO (g), left, and of 7.5 mM ZnAPATHCl with excess NO (g) + air, right. Recorded in acetonitrile.

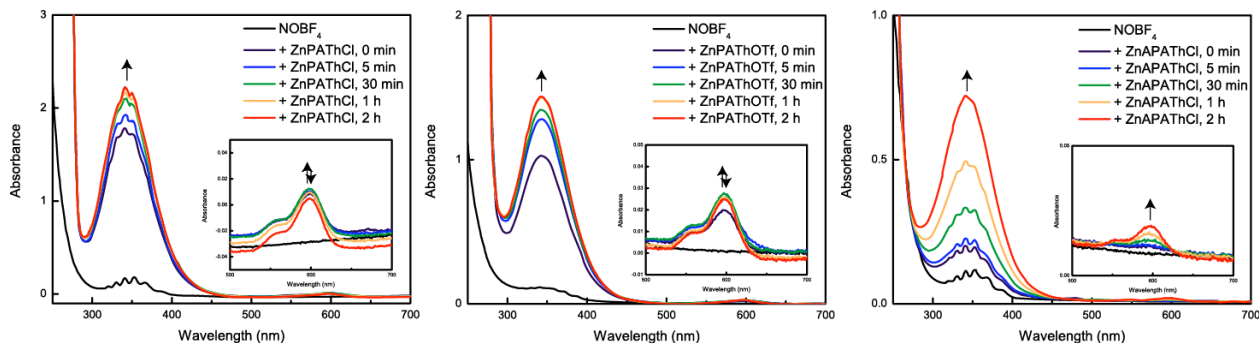

**Figure S4.** Spectral profiles for reactions of 1 equiv of NOBF<sub>4</sub> with 7.5 mM zinc thiolate complexes. From left to right: ZnPATHCl, ZnPATHOTf, and ZnAPATHCl. The low-intensity features observed between 300 nm and 400 nm result from NO<sub>2</sub>BF<sub>4</sub> contamination of commercially available NOBF<sub>4</sub>.

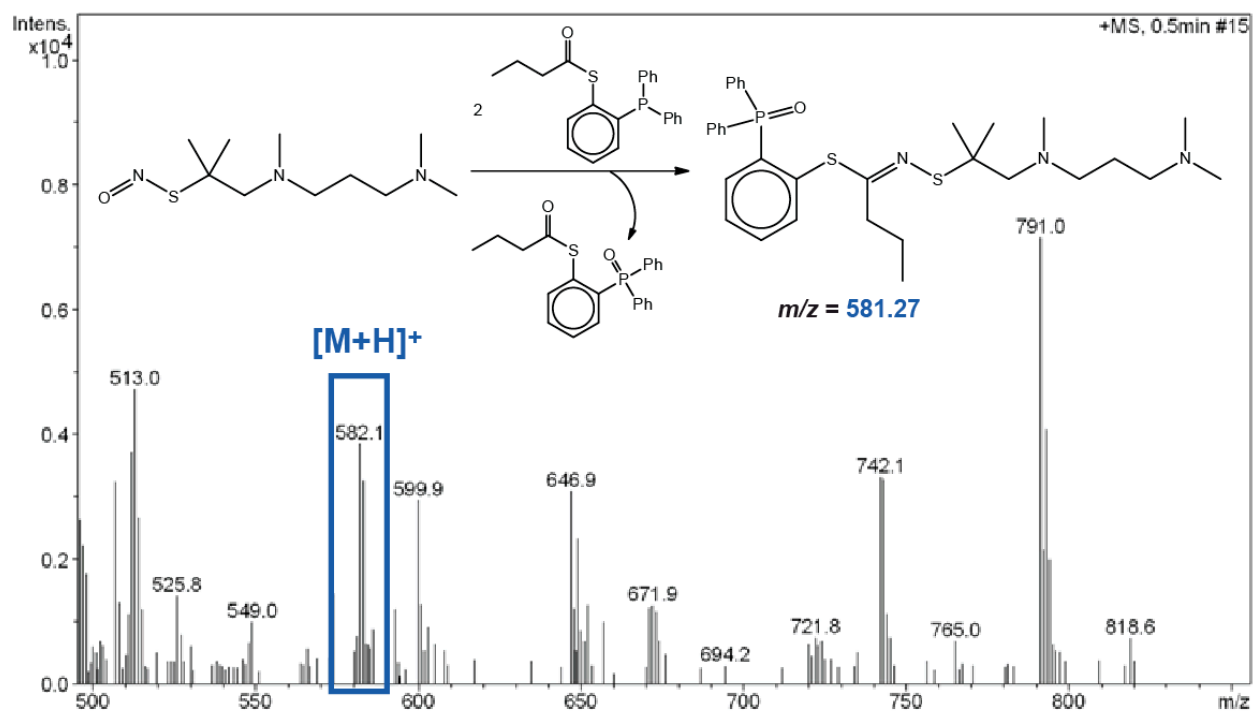

**Figure S5.** ESI-MS spectrum of ZnAPATHCl + 0.9 equiv NOBF<sub>4</sub> + PPh<sub>2</sub>R.

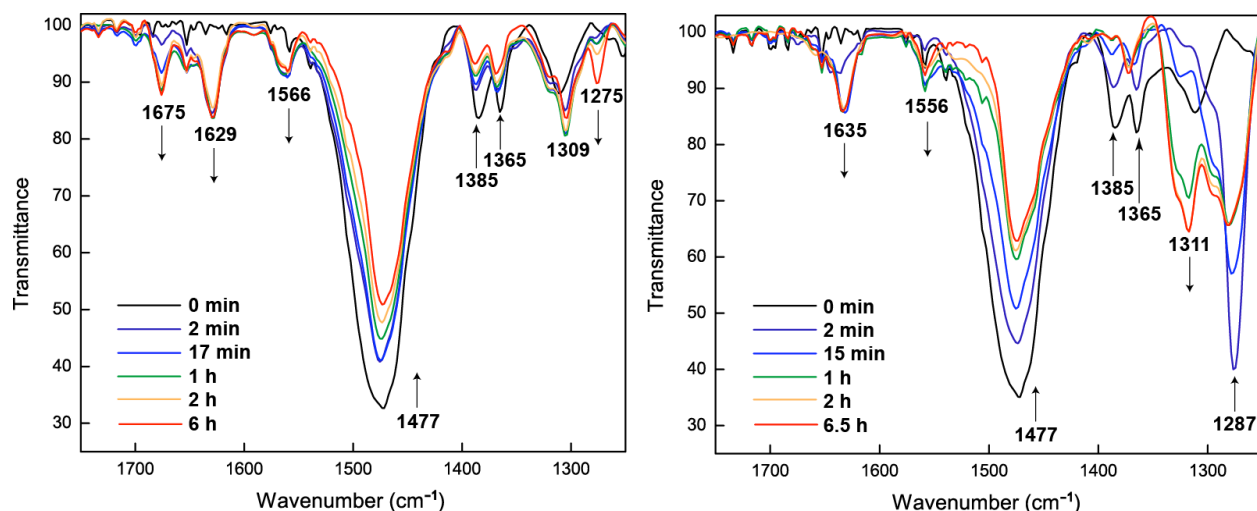

**Figure S6.** Solution IR spectral timecourse for the reactions of APATHNO with 1 equiv of  $\text{ZnCl}_2$  (left) and  $\text{Zn(OTf)}_2$  (right) in  $\text{MeCN-}d_3$ . The  $\nu_{\text{NO}}$  band at  $1477\text{ cm}^{-1}$  for APATHNO disappears upon addition of zinc(II) salt to the nitrosothiol. Because  $\nu_{\text{NO}}$  of APATHNO overlaps the C–H rocking and/or bending modes, some intensity remains after the *S*-nitrosothiol N=O stretch at  $1477\text{ cm}^{-1}$  disappears. For comparison see Figure S1, *right*.

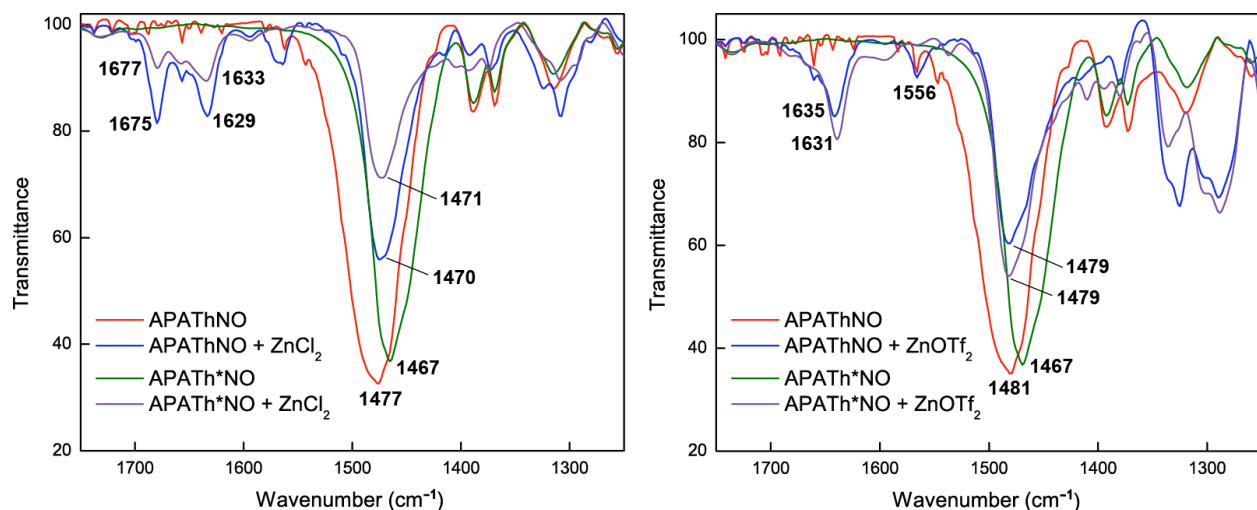

**Figure S7.**  $^{15}\text{N}$  (designated \*N) vs.  $^{14}\text{N}$  spectral comparison of reactions of APATH\*NO and APATHNO with  $\text{ZnCl}_2$  (left) and  $\text{Zn(OTf)}_2$  (right). Recorded in acetonitrile- $d_3$ .

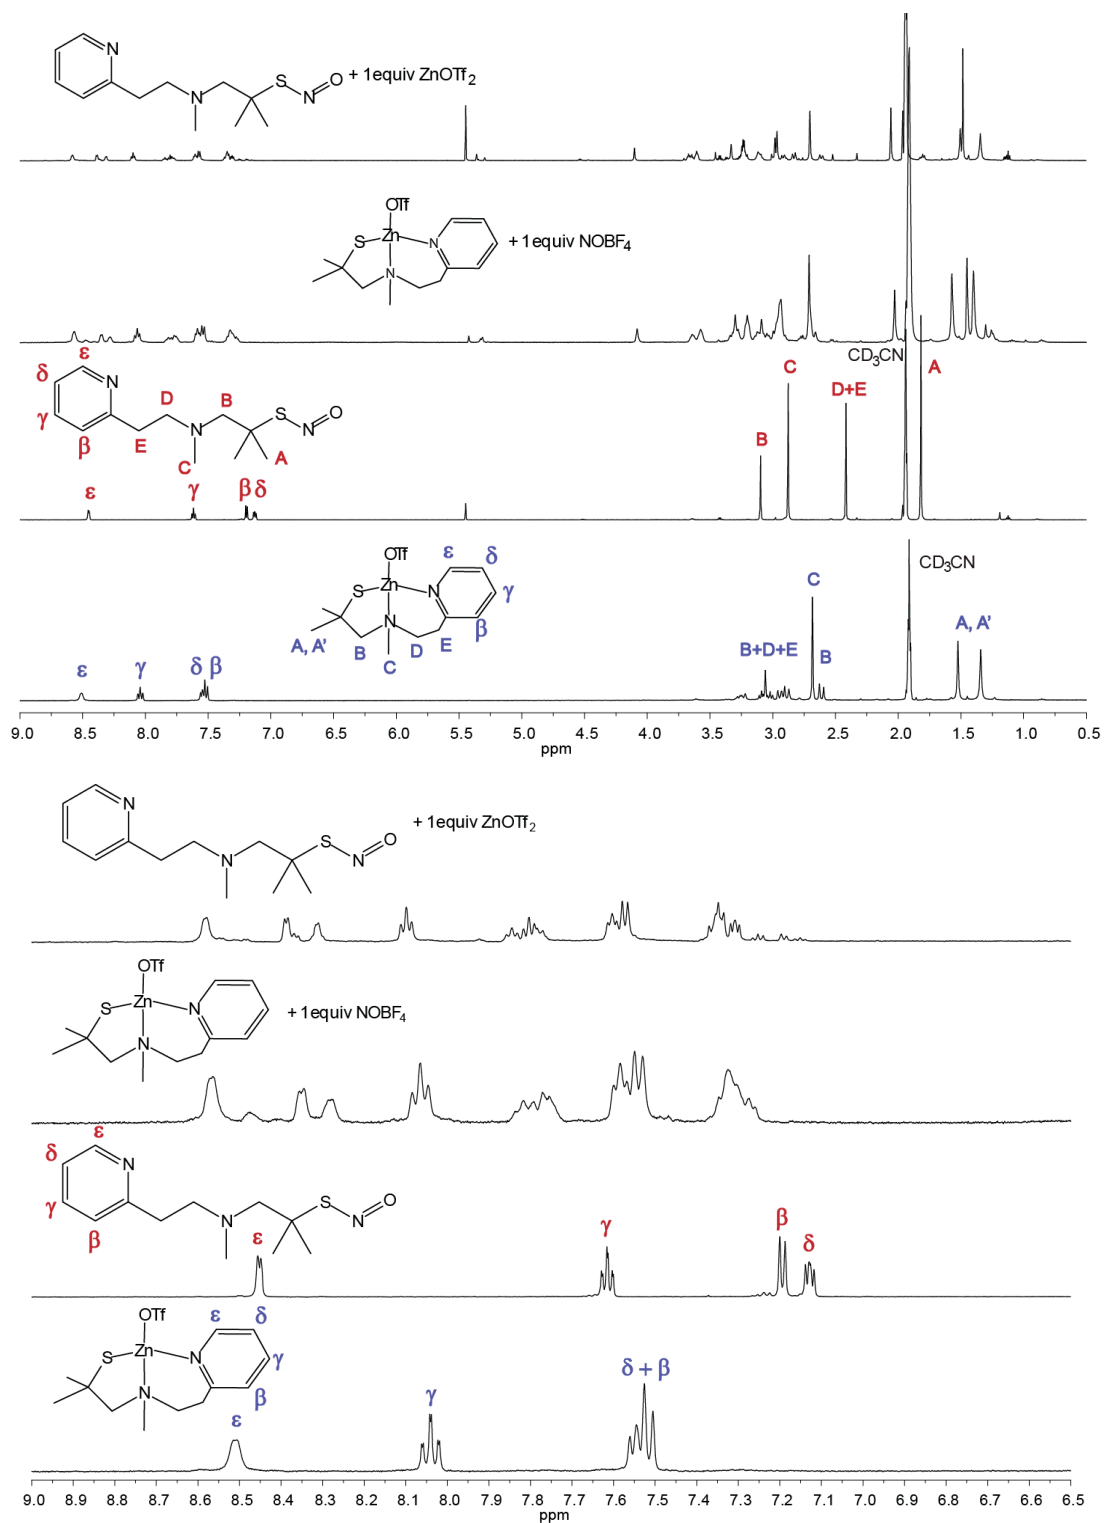

**Figure S8.** Comparison of  $^1\text{H}$  NMR spectra for 7.5 mM  $\text{ZnPATHOTf/NOBF}_4$  vs. 7.5 mM  $\text{PATHNO/Zn(OTf)}_2$  reactions. Recorded in  $\text{MeCN-}d_3$ .

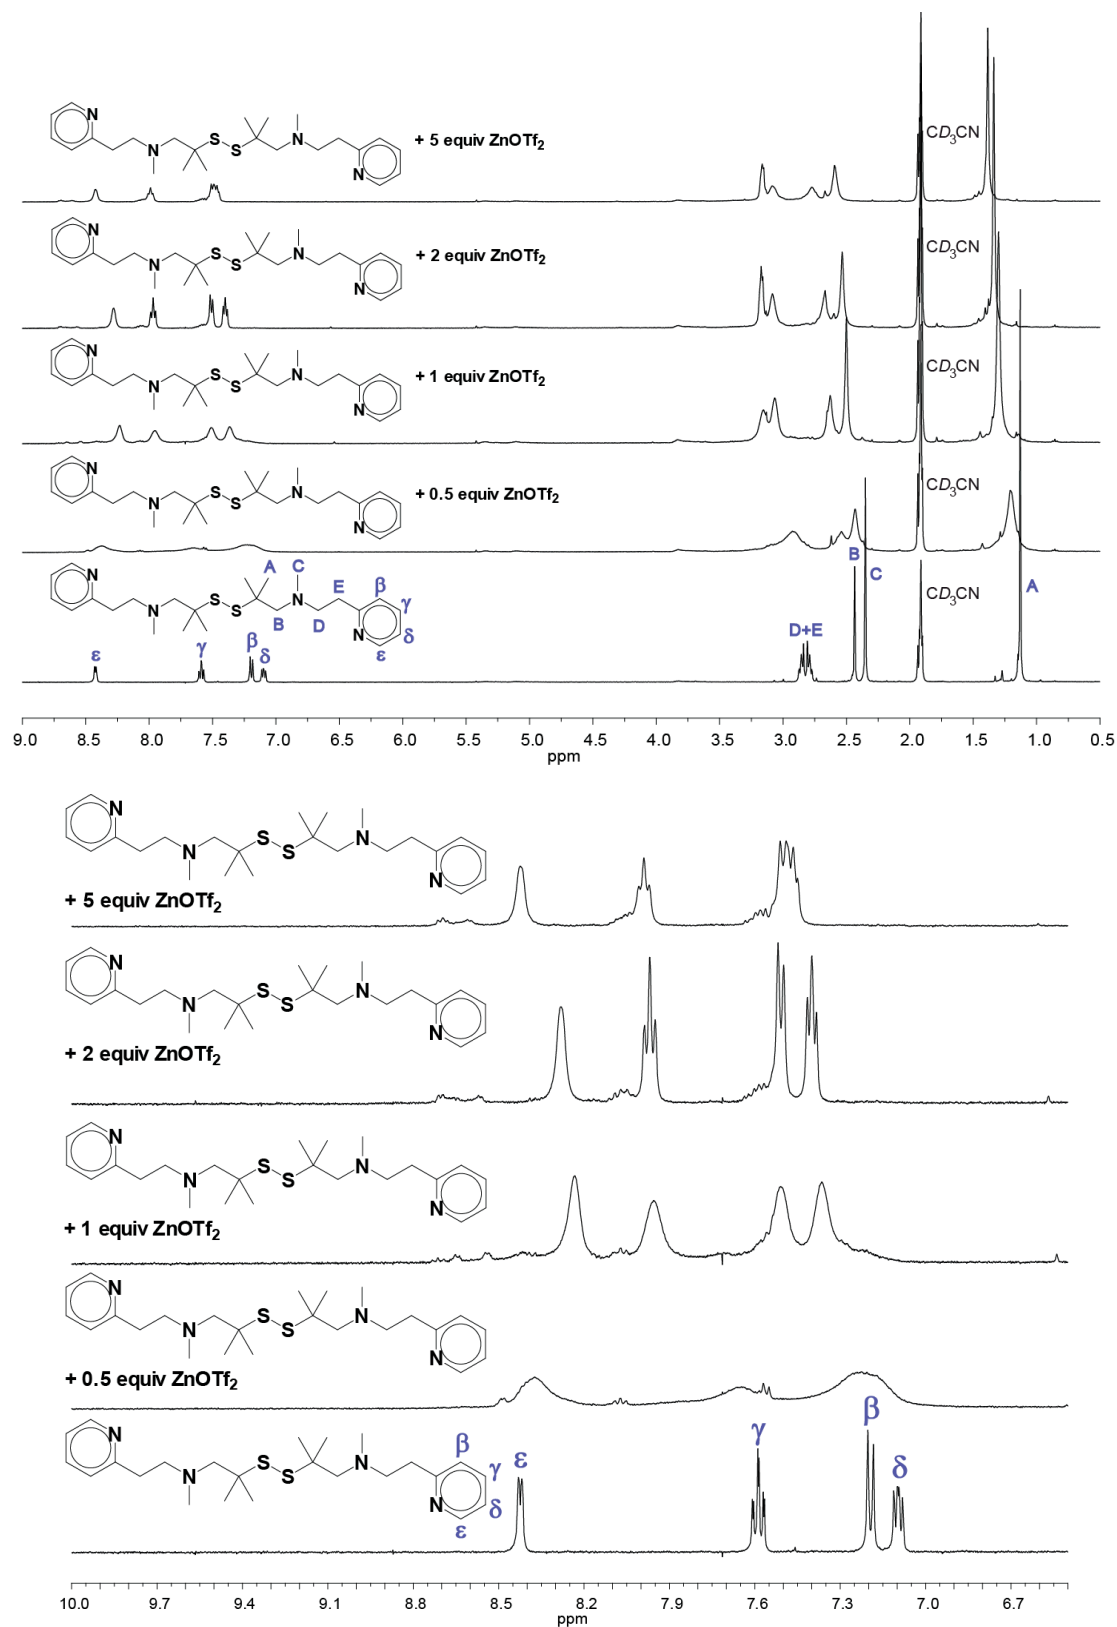

**Figure S9.**  $^1\text{H}$  NMR spectral comparison of  $\text{PATH}_2$  solutions in  $\text{MeCN-}d_3$  containing variable amounts of  $\text{Zn}(\text{OTf})_2$ .

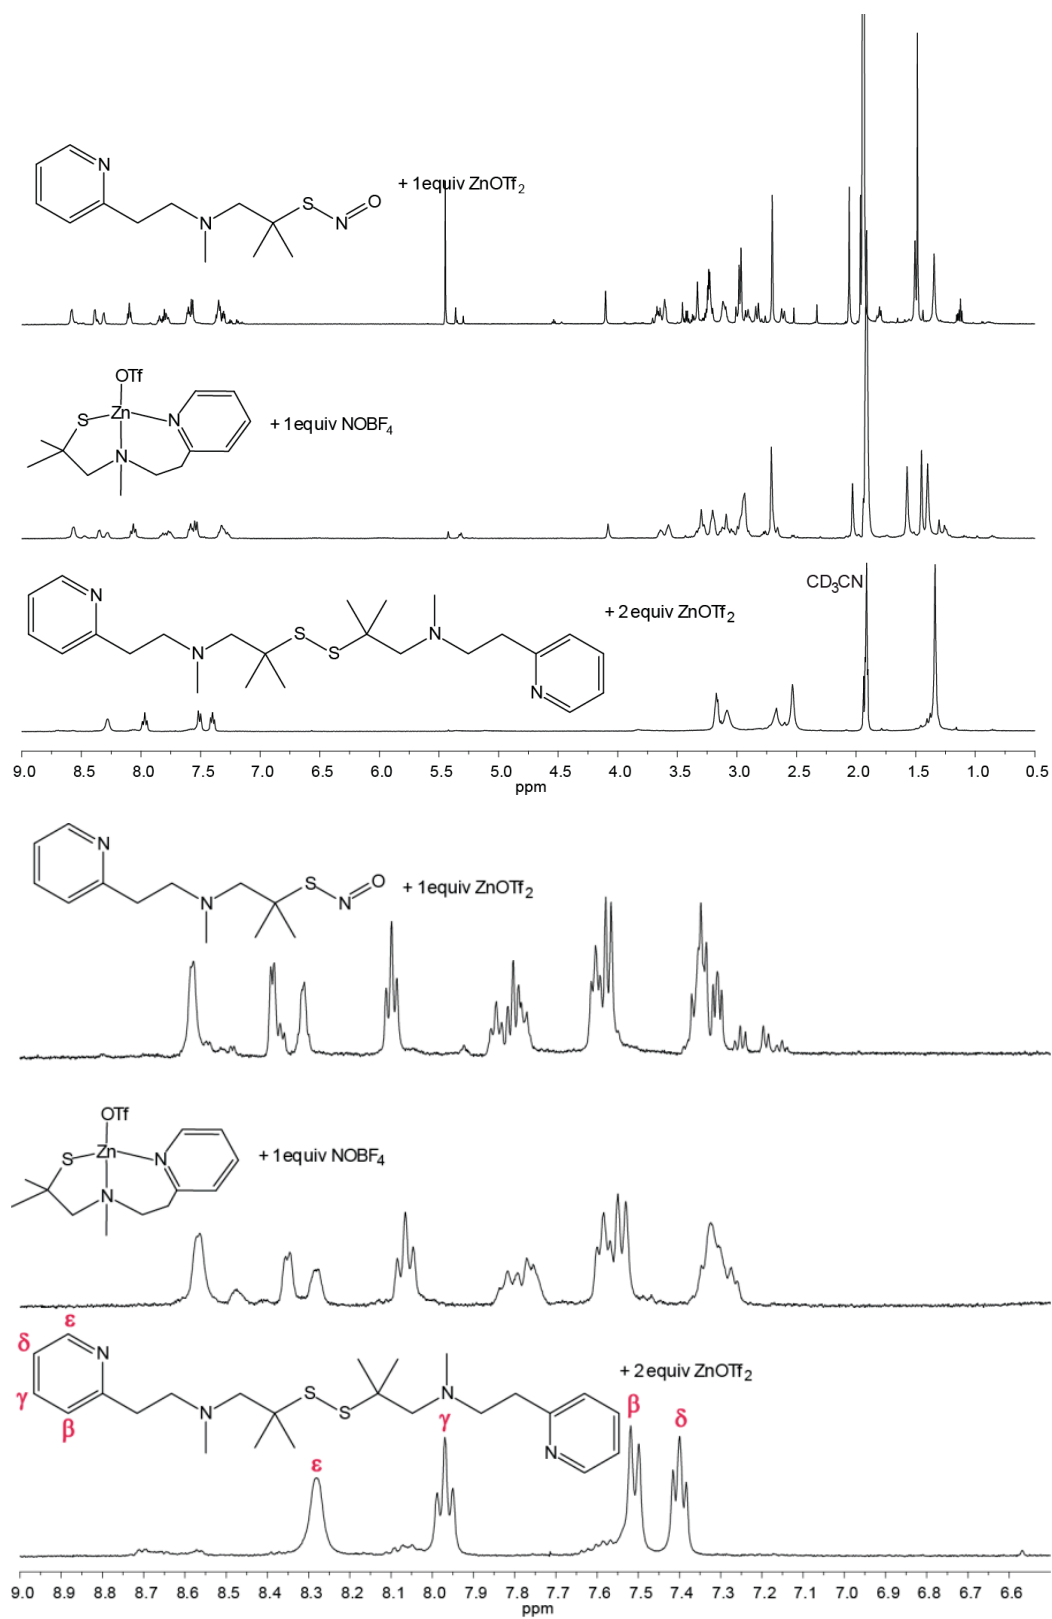

**Figure S10.**  $^1\text{H}$  NMR comparison of a  $\text{PATH}_2/\text{Zn(OTf)}_2$  solution with reaction spectra of  $\text{ZnPATHOTf}$  with  $\text{NOBF}_4$  and  $\text{PATHNO}$  with  $\text{Zn(OTf)}_2$ . Recorded in  $\text{MeCN-}d_3$ .

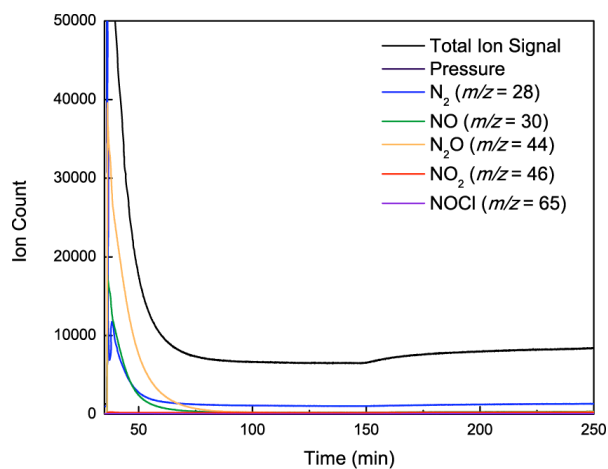

**Figure S11.** EI-MS analysis of the reaction headspace for ZnAPATHCl and NOBF<sub>4</sub> in CH<sub>3</sub>CN.

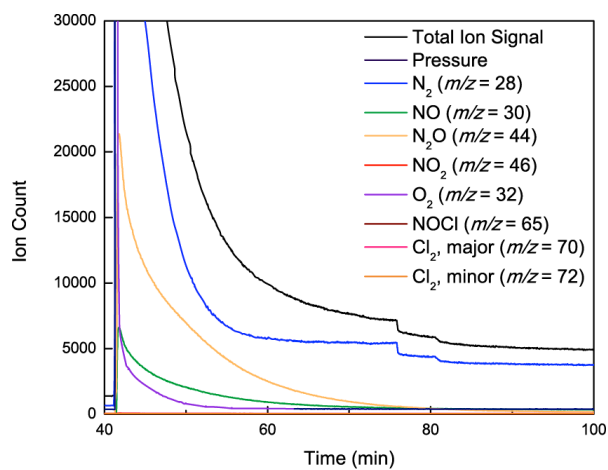

**Figure S12.** EI-MS analysis of the reaction headspace for APATHNO and ZnCl<sub>2</sub> in CH<sub>3</sub>CN.

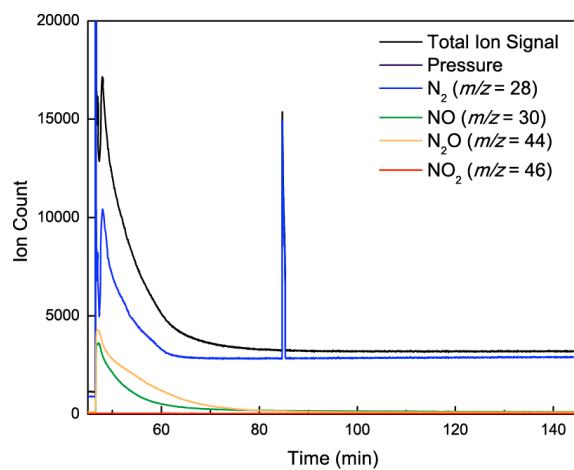

**Figure S13.** EI-MS analysis of the reaction headspace of the APATHNO/ZnOTf<sub>2</sub> reaction in CH<sub>3</sub>CN.



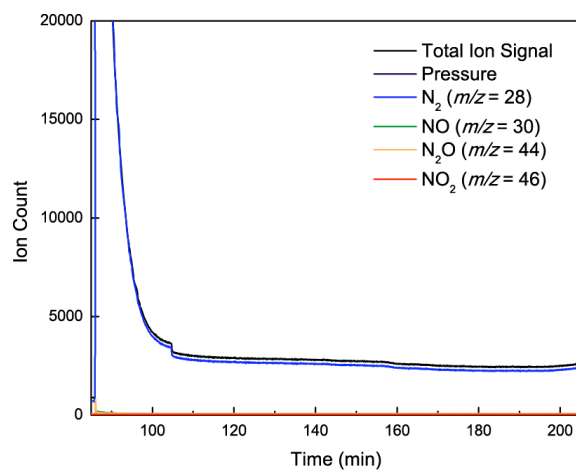

**Figure S14.** EI-MS control experiment: analysis of the solution headspace of APATHNO in CH<sub>3</sub>CN.

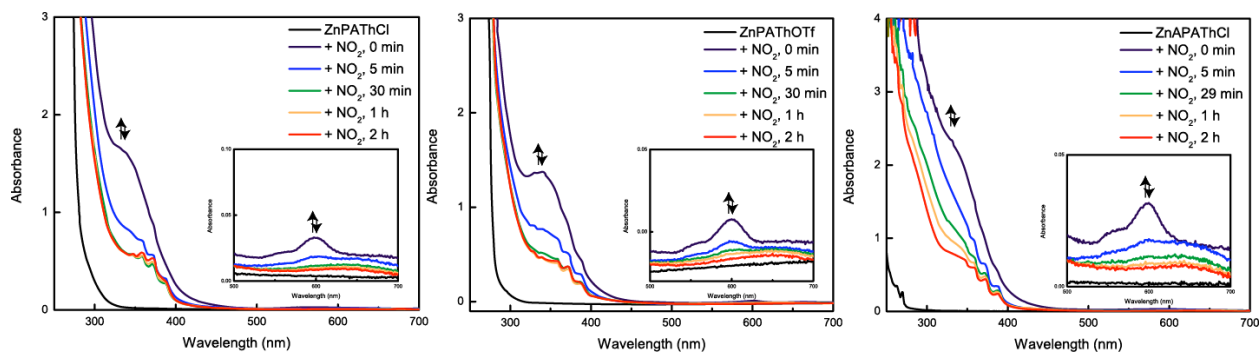

**Figure S15.** Acetonitrile solution spectra of NO<sub>2</sub> reactions with 1.5 mM ZnPATHCl (left), 1.9 mM ZnPATHOTf (middle), and 1.5 mM ZnAPATHCl (right) reactions. The lower intensity peaks appearing in the 350 – 400 nm region of the spectrum are attributed to NO<sub>2</sub>.
